# Supplementary material
Source: MDPI journal article supplement (https://www.mdpi.com/2071-1050/13/3/1314)
Supplement: s1 [file s1]

## Supplementary Material

**Table S1.** Fractions of the total equipment purchase cost assumed to determine the direct and indirect costs of the investment capital and values assumed for the determination of variable and fixed production costs

| Item                      | Detail                                           | Factor/Cost                                           | Ref. |
|---------------------------|--------------------------------------------------|-------------------------------------------------------|------|
| <b>Investment Capital</b> |                                                  |                                                       |      |
| 1                         | Major Equipment                                  | 0.85                                                  | -    |
| <b>Direct Costs</b>       |                                                  |                                                       |      |
| 2                         | Installation                                     | 0.20                                                  | [1]  |
| 3                         | Instrumentation and control                      | 0.15                                                  | [1]  |
| 4                         | Piping                                           | 0.20                                                  | [1]  |
| 5                         | Electrical                                       | 0.10                                                  | [1]  |
| 6                         | Buildings                                        | 0.15                                                  | [1]  |
| 7                         | Yard improvements                                | 0.05                                                  | [1]  |
| 8                         | Services facilities                              | 0.20                                                  | [1]  |
| <b>Indirect Costs</b>     |                                                  |                                                       |      |
| 9                         | Engineering and supervision                      | 0.30                                                  | [1]  |
| 10                        | Construction expenses                            | 0.05                                                  | [1]  |
| 11                        | Contractor's fee                                 | 0.03                                                  | [1]  |
| 12                        | Contingency                                      | 0.08                                                  | [1]  |
| <b>Production Costs</b>   |                                                  |                                                       |      |
| <b>Variable Costs</b>     |                                                  |                                                       |      |
| 1                         | Raw materials                                    | Negligible                                            | -    |
| 2                         | Miscellaneous materials                          | 0.10 of Maintenance                                   | [2]  |
| 3                         | Utilities                                        | Energy values from flowsheet                          | -    |
| 4                         | NaOH (flocculant)                                | 0.33 € kg <sup>-1</sup>                               | [3]  |
| 5                         | NH <sub>4</sub> NO <sub>3</sub> (Nitrate source) | 0.26 € kg <sup>-1</sup>                               | [4]  |
| 6                         | Shipping and packaging                           | Negligible                                            | [2]  |
| <b>Fixed costs</b>        |                                                  |                                                       |      |
| 7                         | Maintenance                                      | 0.05 of Fixed capital                                 | [2]  |
| 8                         | Operating Labour                                 | <b>Nº Operators × Salary × social tax × Nº Months</b> | -    |
| 9                         | Laboratory costs                                 | 0.20 of Operating labour                              | [2]  |
| 10                        | Supervision                                      | 0.20 of Operating labour                              | [2]  |
| 11                        | Plant overheads                                  | 0.50 of Operating labour                              | [2]  |
| 12                        | Capital charges                                  | Negligible                                            | -    |
| 13                        | Insurance                                        | 0.01 of Fixed capital                                 | [2]  |
| 14                        | Local taxes                                      | 0.02 of Fixed capital                                 | [2]  |
| 15                        | Royalties                                        | 0.01 of Fixed capital                                 | [2]  |
| <b>Other Costs</b>        |                                                  |                                                       |      |
| 16                        | Sales expenses                                   | Negligible                                            | -    |
| 17                        | General overheads                                | Negligible                                            | -    |
| 18                        | Research and Development                         | Negligible                                            | -    |

## References

1. Acién, F.G.; Fernández, J.M.; Magán, J.J.; Molina, E. Production cost of a real microalgae production plant and strategies to reduce it. *Biotechnology Advances* **2012**, *30*, 1344–1353, doi:<https://doi.org/10.1016/j.biotechadv.2012.02.005>.
2. Sinnott, R.K.; Towler, G. *Chemical engineering design*, 4<sup>th</sup> ed.; Elsevier: Oxford, UK, 2009; Vol. 6.
3. Kang, S.; Heo, S.; Lee, J.H. Techno-economic analysis of microalgae-based lipid production: Considering influences of microalgal species. *Industrial & Engineering Chemistry Research* **2019**, *58*, 944–955, doi:<https://10.1021/acs.iecr.8b03999>.
4. AHDB. *GB Fertiliser Price Market Update*; UK, 2020.
